# Supplementary material for: Stress Hyperglycemia Is Independently Associated with Persistent Organ Failure in Acute Pancreatitis
Source: PubMed Central journal article supplement — Dig Dis Sci. 2021 May 3;67(5):1879–89. doi: 10.1007/s10620-021-06982-8 (PMC9142444; doi:10.1007/s10620-021-06982-8), 2021-05-03

# Supplementary Figure 1

## A. No pre-existing diabetes

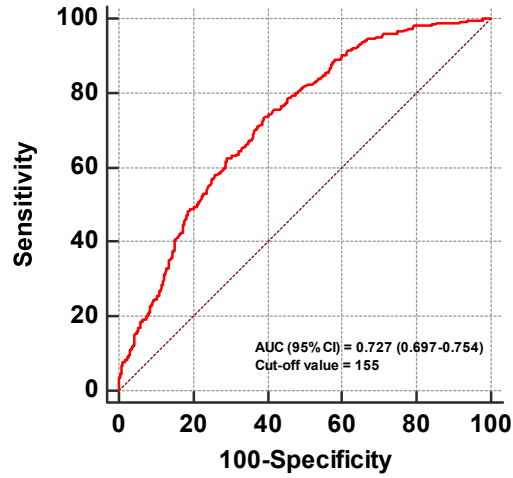

## B. Pre-existing diabetes

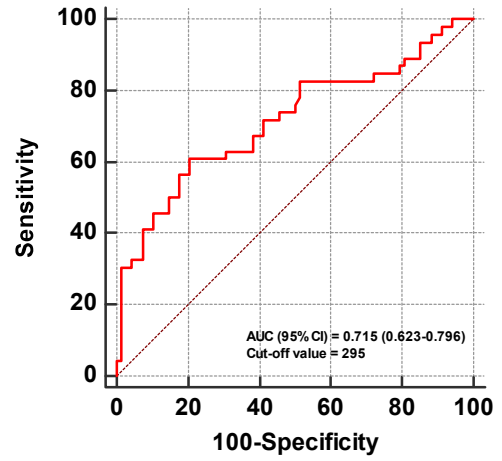

## Supplementary Figure 2

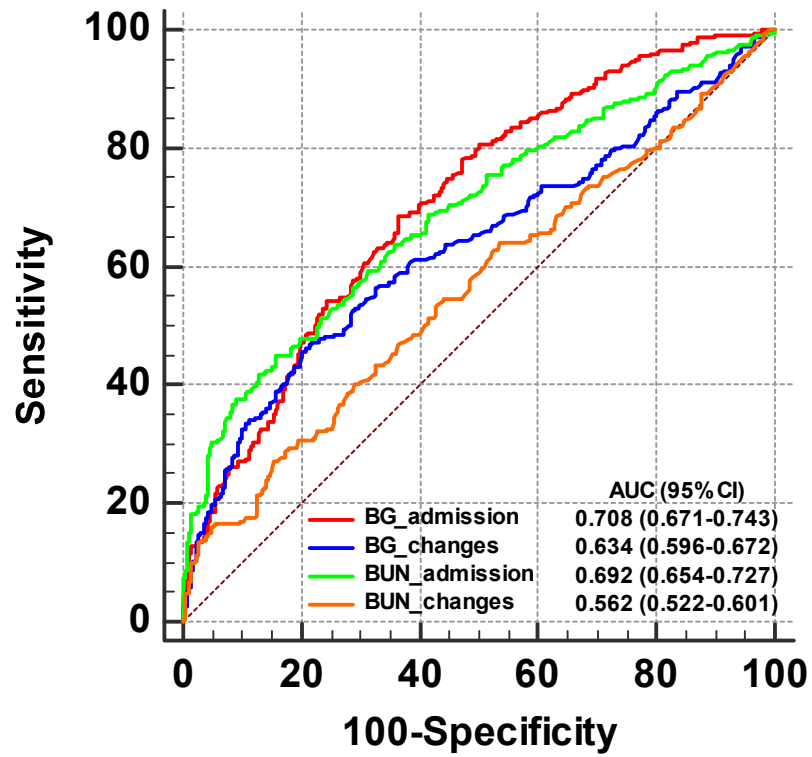

Supplement: 10620_2021_6982_MOESM2_ESM.pdf [file 10620_2021_6982_MOESM2_ESM.pdf]
